# Supplementary material for: FRET-based sensor for visualizing pH variation with colorimetric/ratiometric strategy and application for bioimaging in living cells, bacteria and zebrafish
Source: Royal Society of Chemistry journal article supplement (doi:10.1039/d0an00841a), 2020-01-01
Supplement: d0an00841a1.pdf [file d0an00841a1.pdf]

*Electronic Supporting Information*

**FRET-based sensor for visualizing pH variation with colorimetric/ratiometric and application for bioimaging in living cells, bacteria and zebrafish**

Hong Chen,<sup>a</sup> Feng Ding,<sup>c</sup> Zhan Zhou,<sup>d</sup> Xiaojun He,<sup>b,\*</sup> and Jianliang Shen<sup>b,c,\*</sup>

<sup>a</sup>Luoyang Key Laboratory of Organic Functional Molecules, College of Food and Drug, Luoyang Normal University, Luoyang, Henan 471934, China

<sup>b</sup>School of Ophthalmology & Optometry, School of Biomedical Engineering, Wenzhou Medical University, Wenzhou, Zhejiang 325035, China

<sup>c</sup>Engineering Research Center of Clinical Functional Materials and Diagnosis & Treatment Devices of Zhejiang Province, Wenzhou Institute, University of Chinese Academy of Sciences, Wenzhou, Zhejiang 325001, China

<sup>d</sup>College of Chemistry and Chemical Engineering, Henan Key Laboratory of Function-Oriented Porous Materials, Luoyang Normal University, Luoyang, Henan 471934, China

<sup>e</sup>Department of Microbiology & Immunology, School of Basic Medical Sciences, Wenzhou Medical University, Wenzhou, Zhejiang 325035, China

\*Corresponding Author:

Email: [hexiaojun2008@163.com](mailto:hexiaojun2008@163.com) (X. He), [shenjl@wibe.ac.cn](mailto:shenjl@wibe.ac.cn) (J. Shen)

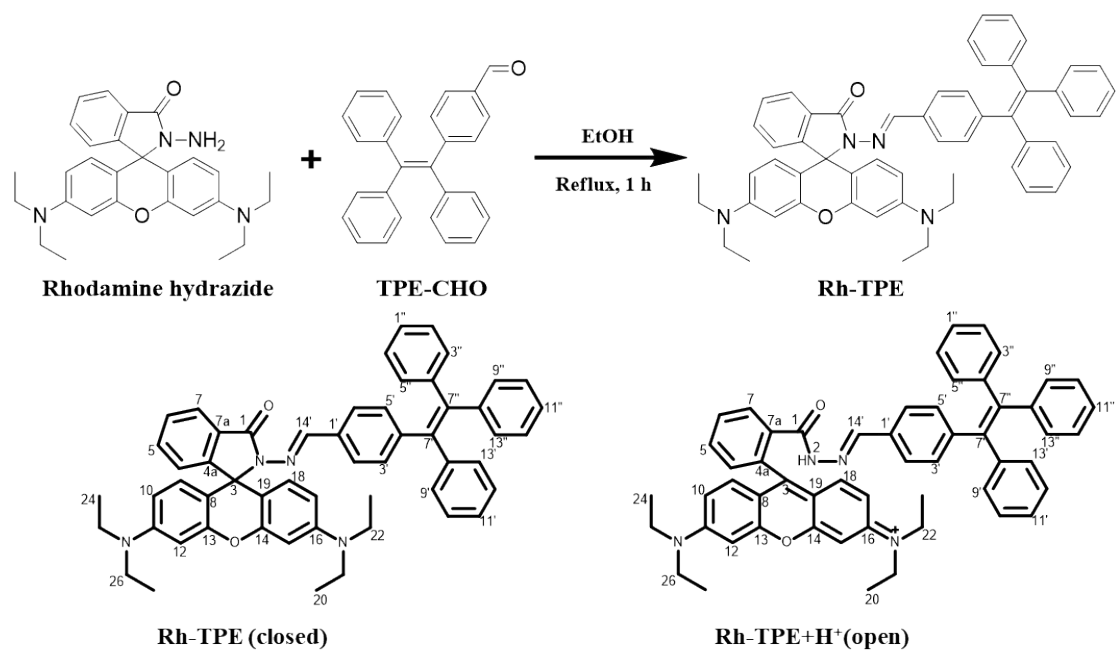

**Scheme S1** Synthetic routes of **Rh-TPE** sensor, and the structure of **Rh-TPE** in neutral and acidic condition.

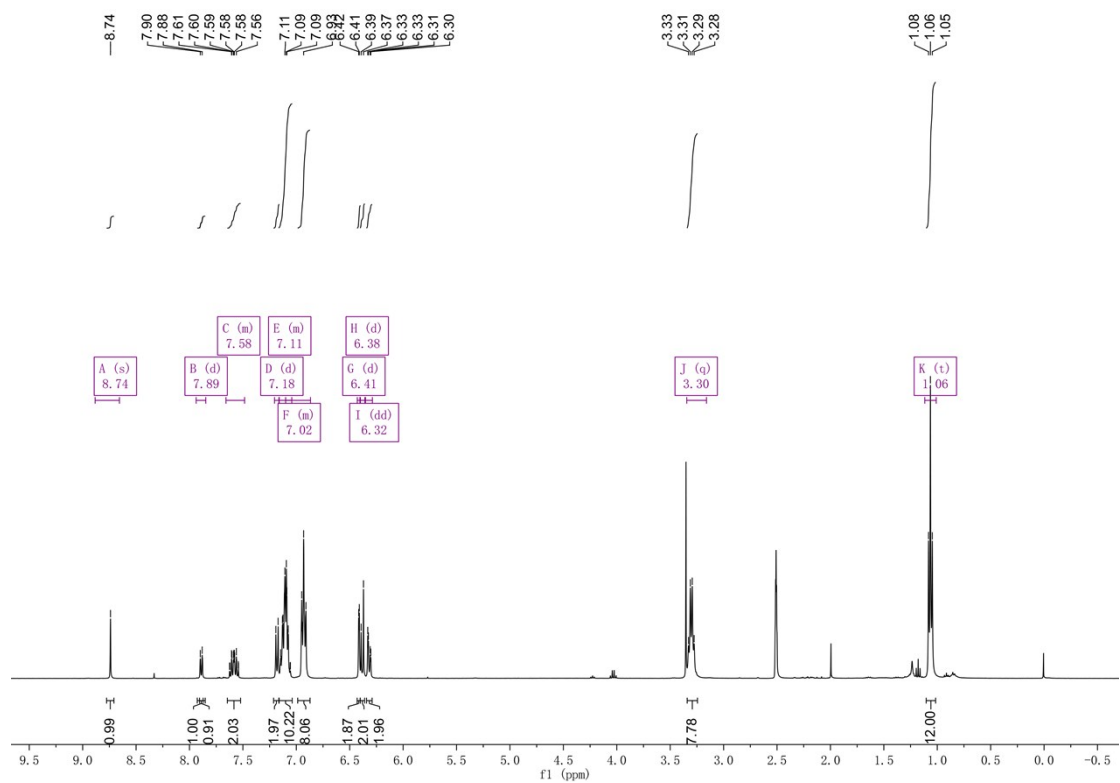

**Figure S1**  $^1\text{H}$  NMR spectra of **Rh-TPE** sensor in  $\text{DMSO-}d_6$ .

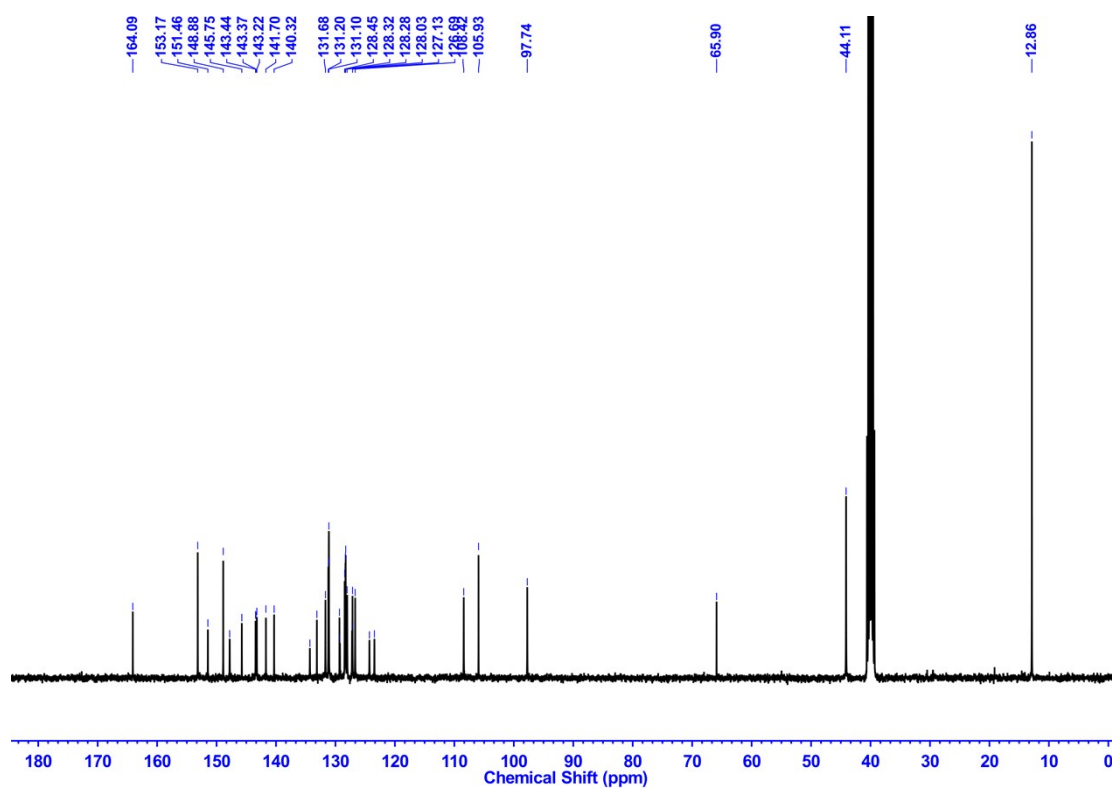

**Figure S2**  $^{13}\text{C}$  NMR spectra of **Rh-TPE** sensor in  $\text{DMSO-}d_6$ .

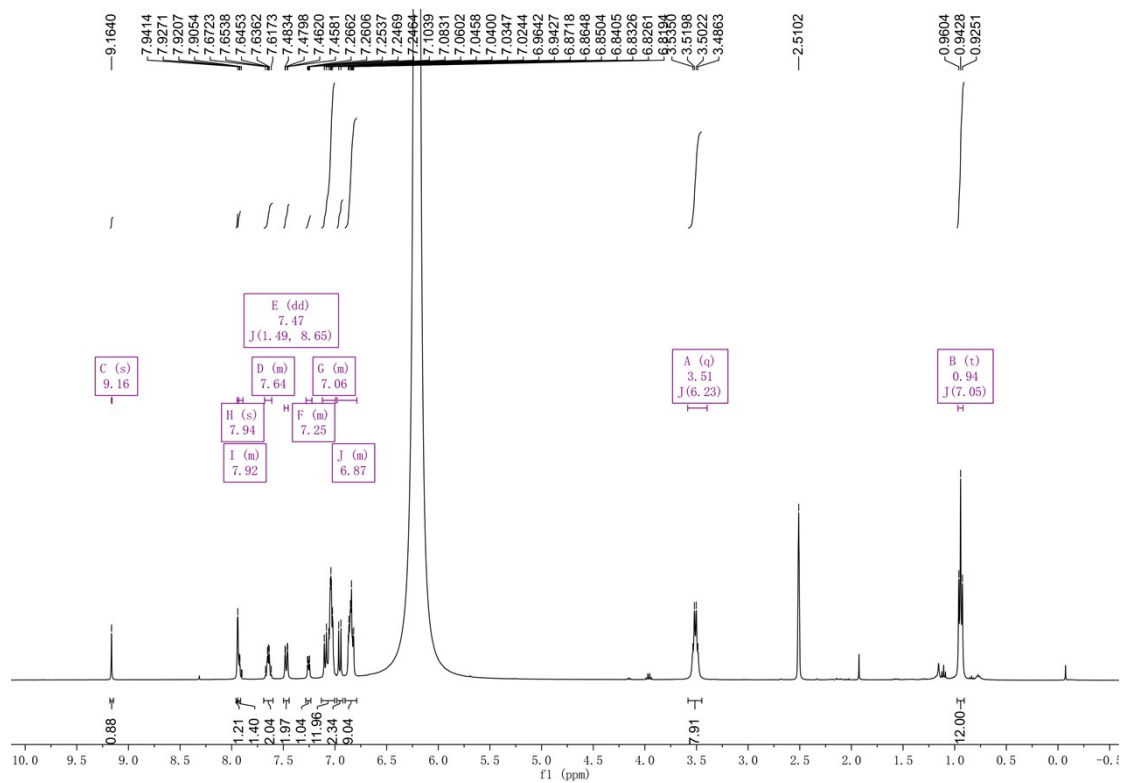

**Figure S3**  $^1\text{H}$  NMR spectra of Rh-TPE sensor after addition of  $\text{H}^+$  in  $\text{DMSO-}d_6$ .

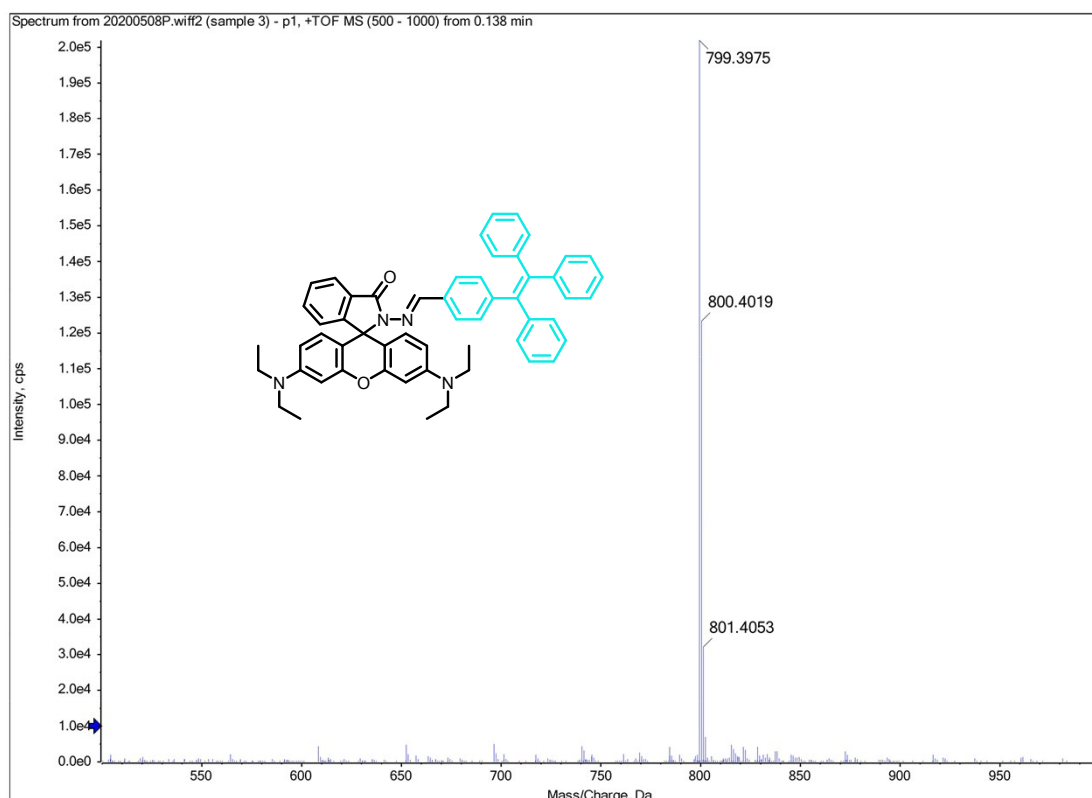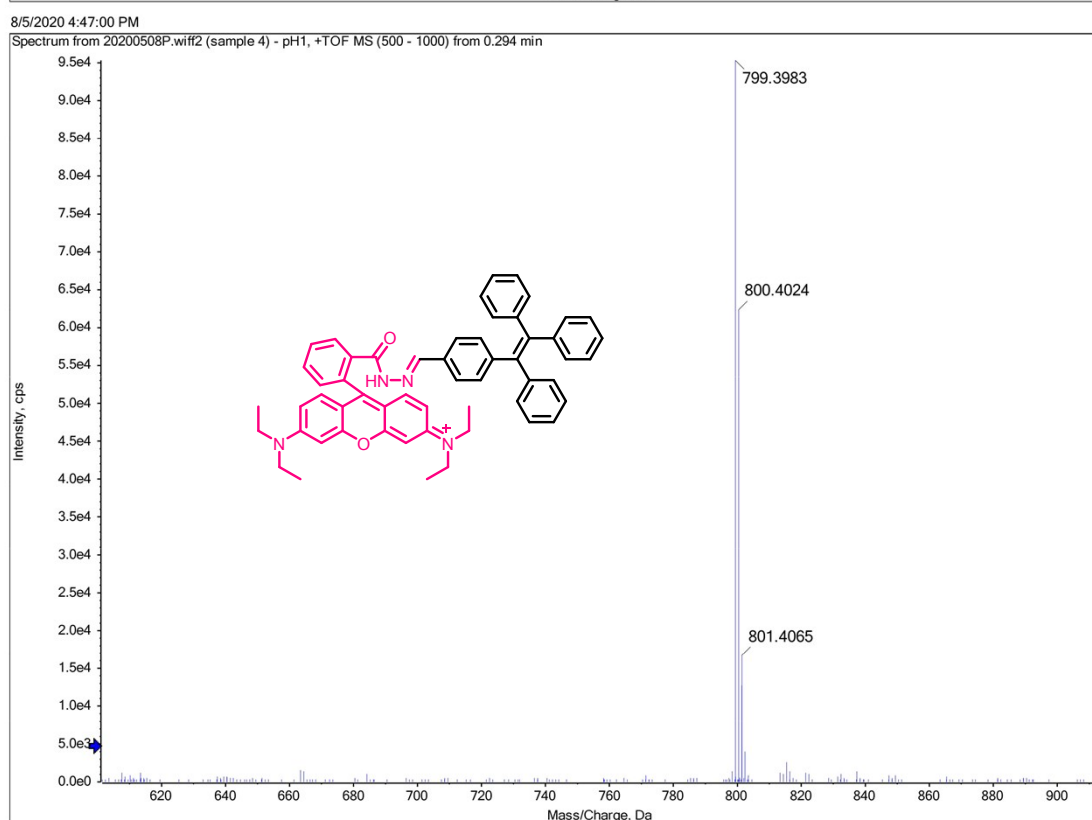

8/5/2020 4:35:12 PM

**Figure S4** Mass spectrum of Rh-TPE with and without addition of H<sup>+</sup> in EtOH.

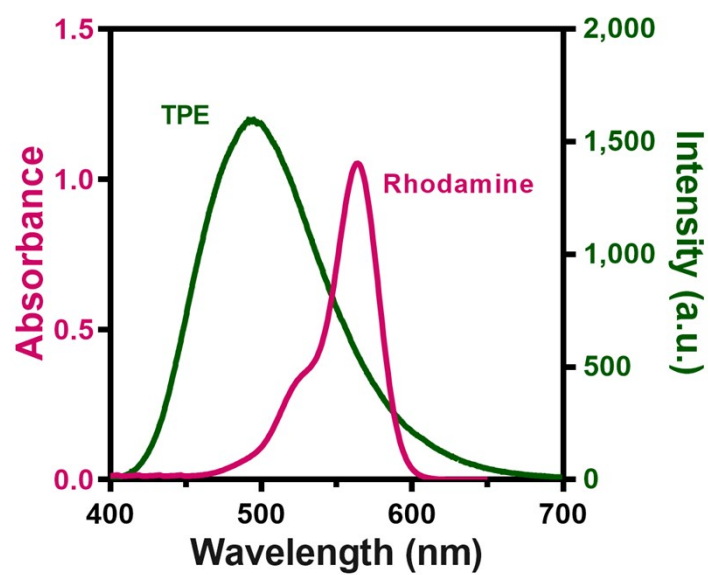

**Figure S5** The overlap spectra of the absorption of Rhodamine and emission of TPE.

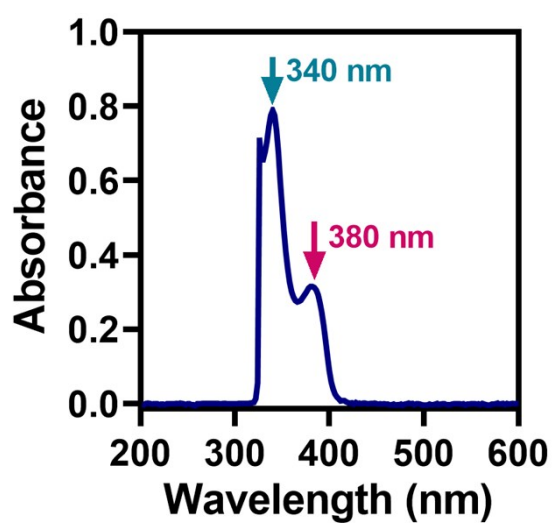

**Figure S6** The excitation spectrum of Rh-TPE in buffer (1% DMSO) at pH 8.4.

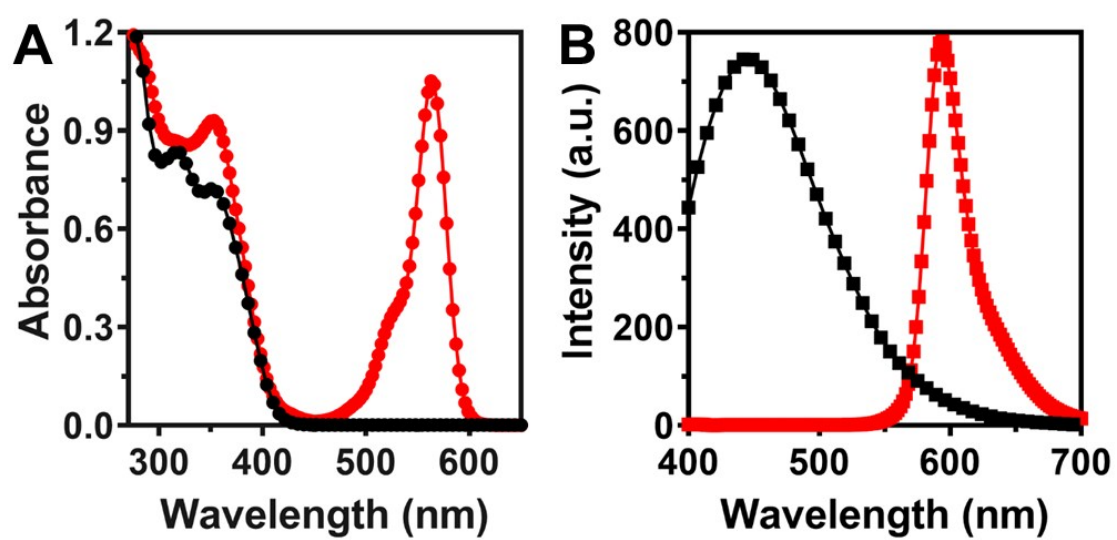

**Figure S7** (A) Absorption spectra (10  $\mu$ M) and (B) fluorescence spectra (5  $\mu$ M) of **Rh-TPE** in BR buffer (include 1% DMSO) at pH 8.4 (black line) and pH 2.0 (red line), respectively.

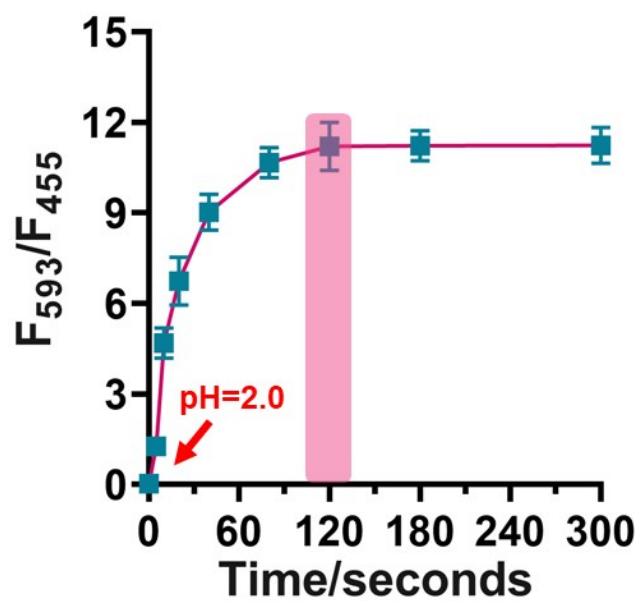

**Figure S8** Time-depend fluorescence responses ( $F_{593}/F_{455}$ ) of 5  $\mu$ M **Rh-TPE** at pH 2.0 buffer solution.

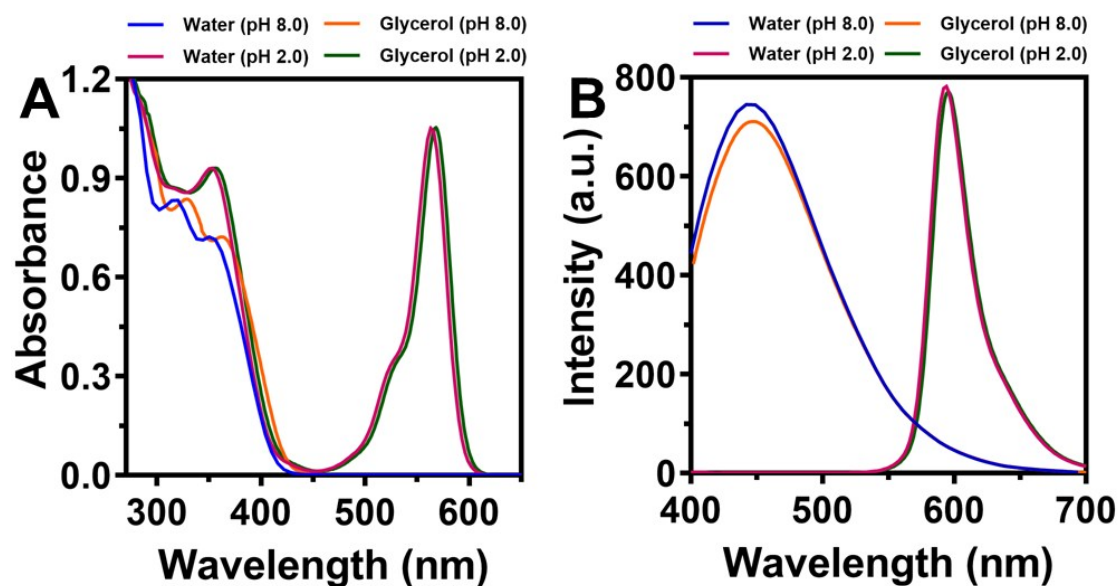

**Figure S9** Detection the effect of viscosity on the sensor in water-glycerol system. (A) Absorption spectra of **Rh-TPE** (10  $\mu$ M) in the water (containing 1% DMSO) and glycerol (containing 1% DMSO) at pH 8.0 and pH 2.0. (B) Fluorescence spectra of **Rh-TPE** (5  $\mu$ M) in the water (containing 1% DMSO) and glycerol (containing 1% DMSO) at pH 8.0 and pH 2.0.

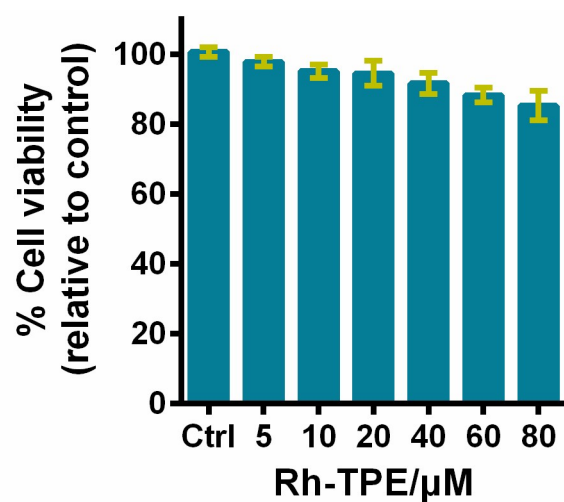

**Figure S10** Cell viability test using the MTT assay in hPDLCs cells at 24 h of culture. PBS treatment as a control group. The concentration of **Rh-TPE** sensor varied from 5 to 80  $\mu\text{M}$ . Results are presented as the mean of the three measurements  $\pm$  standard deviation. ( $n = 3$ )
